# Supplementary material for: Mesoporous Zr-Beta zeolites prepared by a post-synthetic strategy as a robust Lewis acid catalyst for the ring-opening aminolysis of epoxides
Source: Royal Society of Chemistry journal article supplement (doi:10.1039/c4gc02116a), 2015-01-01
Supplement: c4gc02116a1.pdf [file c4gc02116a1.pdf]

**Mesoporous Zr-Beta zeolite prepared by post-synthetic strategy  
as a robust Lewis acid catalyst for the ring-opening aminolysis of  
epoxides**

Bo Tang<sup>1</sup>, Weili Dai<sup>1</sup>, Xiaoming Sun<sup>1,2</sup>, Guangjun Wu<sup>1</sup>, Naijia Guan<sup>1</sup>, Michael  
Hunger<sup>2</sup>, Landong Li<sup>1,\*</sup>

*<sup>1</sup> Key Laboratory of Advanced Energy Materials Chemistry of Ministry of Education,  
Collaborative Innovation Center of Chemical Science and Engineering (Tianjin),  
College of Chemistry, Nankai University, Tianjin 300071, China*

*<sup>2</sup> Institute of Chemical Technology, University of Stuttgart, 70550 Stuttgart,  
Germany*

\*Corresponding author

Tel./Fax: + 86-22-23500341

E-mail address: [lild@nankai.edu.cn](mailto:lild@nankai.edu.cn) (L. Li)

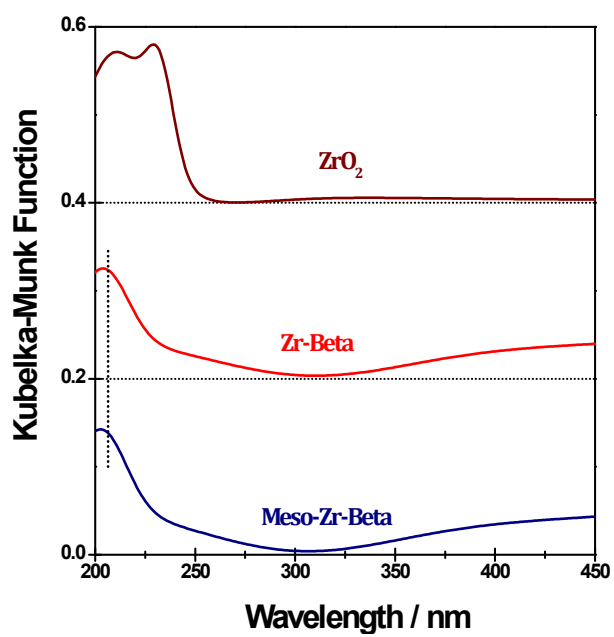

**Figure S1** UV-vis spectra of Zr-Beta and Meso-Zr-Beta samples.

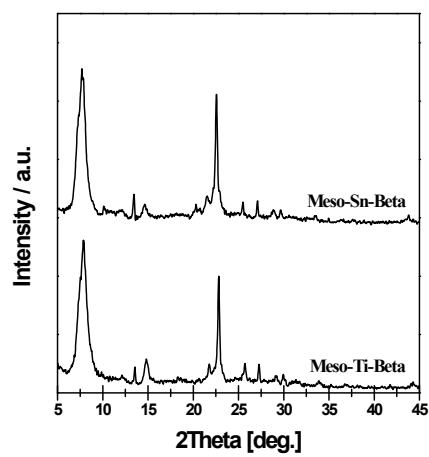

**Figure S2** XRD patterns of Meso-Ti-Beta and Meso-Sn-Beta samples.

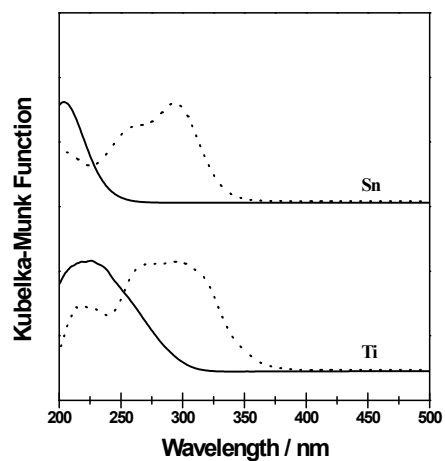

**Figure S3** UV-vis spectra of Meso-Ti-Beta and Meso-Sn-Beta samples. UV-vis spectra of corresponding bulk metal oxides SnO<sub>2</sub> and anatase TiO<sub>2</sub> are shown in dashed lines for reference

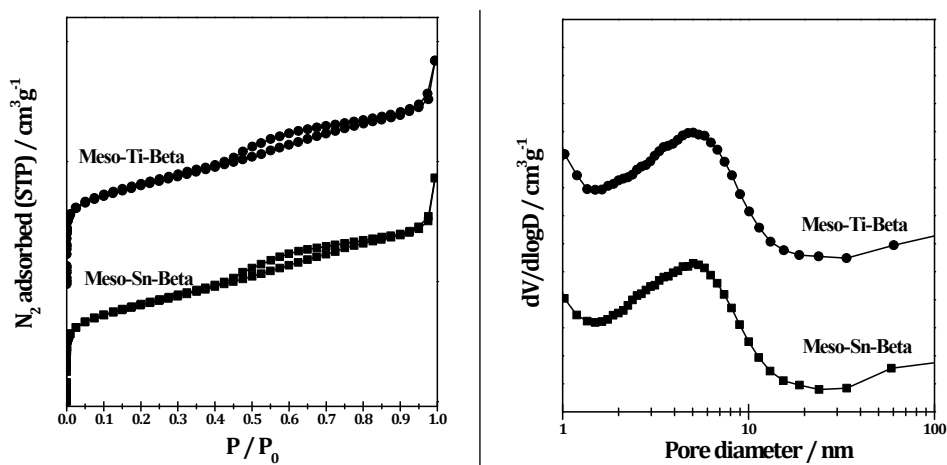

**Figure S4** N<sub>2</sub> adsorption/desorption isotherms and pore diameter distribution of Meso-Sn-Beta and Meso-Ti-Beta

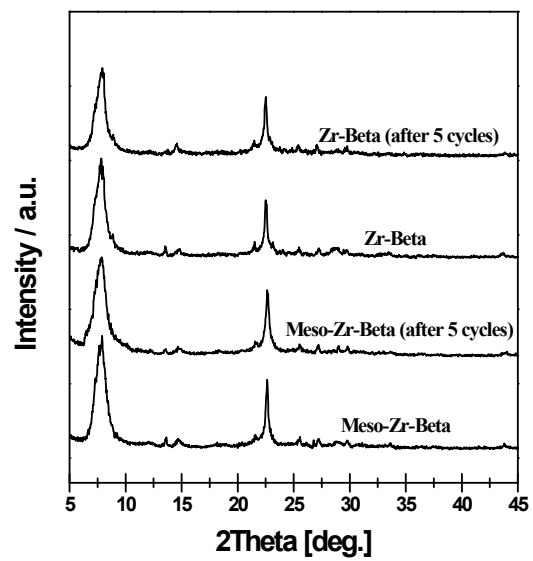

**Figure S5** XRD patterns of fresh and reused Zr-containing silicates samples.

**Table S1** Comparison between the catalytic activity of the ring-opening aminolysis of styrene oxide with aniline over various catalysts <sup>a</sup>

| Catalyst <sup>b</sup>     | Temperature / Time | Styrene oxide Conv. (%) | Product select. (%) | TON (mol <sub>Epo</sub> mol <sub>M</sub> <sup>-1</sup> ) | Average TOF (h <sup>-1</sup> ) | Ref.       |
|---------------------------|--------------------|-------------------------|---------------------|----------------------------------------------------------|--------------------------------|------------|
| TS-1 (30)                 | 308K / 6h          | 39.1                    | 88.1                | 312                                                      | 52                             | [39]       |
| Ti-MCM-41 (30)            | 308K / 6h          | 92                      | 95.8                | 726                                                      | 121                            | [39]       |
| Ti-SBA-15 (30)            | 308K / 6h          | 90.2                    | 92.1                | 654                                                      | 109                            | [39]       |
| Ti-SBA-12 (30)            | 308K / 6h          | 93.7                    | 92.9                | 882                                                      | 147                            | [39]       |
| Ti-SBA-16 (30)            | 308K / 6h          | 86.9                    | 93.5                | 936                                                      | 156                            | [39]       |
| Zr-ZSM-5 (50)             | 318K / 5min        | 26                      | 96                  | 195                                                      | 2340                           | [40]       |
| Ti-Nano(PrTES)-ZSM-5 (50) | 318K / 5min        | 8                       | 92                  | 58                                                       | 695                            | [40]       |
| Ti-Nano(TPHAC)-ZSM-5 (50) | 318K / 5min        | 8                       | 91                  | 56                                                       | 677                            | [40]       |
| Zr-Nano(PrTES)-ZSM-5 (50) | 318 K / 5 min      | 83                      | 96                  | 587                                                      | 7040                           | [40]       |
| Zr-Nano(TPHAC)-ZSM-5 (50) | 318K / 5min        | 79                      | 94                  | 566                                                      | 6790                           | [40]       |
| Zr-Beta (100)             | 308K / 0.5h        | 40.5                    | 94.4                | 486                                                      | 972                            | this study |
| Meso-Sn-Beta (100)        | 308K / 0.5h        | 41.0                    | 91.1                | 492                                                      | 984                            | this study |
| Meso-Ti-Beta (100)        | 308K / 0.5h        | 56.6                    | 92.4                | 679                                                      | 1358                           | this study |
| Meso-Zr-Beta (100)        | 308 K / 0.5 h      | 80.7                    | 94.7                | 968                                                      | 1936                           | this study |
| Meso-Zr-Beta (100)        | 318K / 5min        | 67.5                    | 95.8                | 810                                                      | 9720                           | this study |

<sup>a</sup> Reaction conditions: n(epoxide) / n(amine) = 1:1; <sup>b</sup> Values in parentheses indicate the Si/Al molar ratio of catalysts.

**Table S2** Physicochemical properties of Zr-silicate zeolites.

| Sample                    | $n_{\text{Si}}/n_{\text{Zr}}$ <sup>b</sup> | Surface area (m <sup>2</sup> g <sup>-1</sup> ) <sup>c</sup> |
|---------------------------|--------------------------------------------|-------------------------------------------------------------|
| Zr-Beta                   | 97.3                                       | 600                                                         |
| Meso-Zr-Beta              | 97.0                                       | 720                                                         |
| Zr-Beta <sup>a</sup>      | 96.9                                       | 437                                                         |
| Meso-Zr-Beta <sup>a</sup> | 97.1                                       | 715                                                         |

<sup>a</sup> After five cycles; <sup>b</sup> Determined by ICP;

<sup>c</sup> Determined by nitrogen adsorption
